# Supplementary material for: Association between Interleukin-1 Polymorphisms and Susceptibility to Dental Peri-Implant Disease: A Meta-Analysis
Source: MDPI journal article supplement (doi:10.3390/pathogens10121600), 2021-12-09
Supplement: s1 [file s1]

**Table S1.** Characteristics of the studies included in the meta-analysis.

| First author, publication year | Country   | Ethnicity | No. of Cases | No. of Controls | Polymorphism (s): <i>p</i> -value of HWE in control groups                                                                                                                                       | Outcome                                     | Matched factors* (cases vs. controls) | Quality score |
|--------------------------------|-----------|-----------|--------------|-----------------|--------------------------------------------------------------------------------------------------------------------------------------------------------------------------------------------------|---------------------------------------------|---------------------------------------|---------------|
| Rogers, 2002[27]               | Australia | Caucasian | 19           | 31              | <i>IL-1A</i> (-889): 0.380,<br><i>IL-1B</i> (+3953): 0.694,<br>Composite genotype of <i>IL-1A</i> (-889) and <i>IL-1B</i> (+3953)                                                                | Implant failure                             | NR                                    | 7             |
| Shimpuku, 2003[28]             | Japan     | Asian     | 17           | 22              | <i>IL-1A</i> (-889): 0.639,<br><i>IL-1B</i> (-511): 0.338,<br><i>IL-1B</i> (+3954): 0.823                                                                                                        | Marginal bone loss                          | Age, sex, and smoking                 | 7             |
| Campos, 2005 [29]              | Brazil    | Mixed     | 28           | 34              | <i>IL-1A</i> (-889): 0.157,<br><i>IL-1B</i> (-511): 0.790,<br><i>IL-1B</i> (+3953): 0.558,<br><i>IL-1RN</i> (VNTR): 0.863,<br>Composite genotype of <i>IL-1A</i> (-889) and <i>IL-1B</i> (+3953) | Implant failure                             | Age, sex, and smoking                 | 7             |
| Laine, 2006[30]                | Sweden    | Caucasian | 71           | 49              | <i>IL-1A</i> (-889): 0.102,<br><i>IL-1B</i> (-511): 0.437,<br><i>IL-1B</i> (+3954): 0.783,<br>Composite genotype of <i>IL-1A</i> (-889) and <i>IL-1B</i> (+3954)                                 | Peri-implantitis                            | Age                                   | 7             |
| Lachmann, 2007[31]             | German    | Caucasian | 11           | 18              | Composite genotype of <i>IL-1A</i> (-889) and <i>IL-1B</i> (+3954)                                                                                                                               | Peri-implantitis                            | NR                                    | 6             |
| Lin, 2007[32]                  | China     | Asian     | 29           | 30              | <i>IL-1B</i> (-511): 0.955<br><i>IL-1B</i> (+3954): 0.850                                                                                                                                        | Marginal bone loss                          | Age, sex, and smoking                 | 8             |
| Montes, 2009[33]               | Brazil    | Mixed     | 90           | 176             | <i>IL-1B</i> (+3954): 0.779                                                                                                                                                                      | Implant failure                             | Age, sex, and smoking                 | 7             |
| Dirschabel, 2011[34]           | Brazil    | Mixed     | 92           | 185             | <i>IL-1B</i> (-511): 0.994                                                                                                                                                                       | Implant failure                             | Age, sex, and smoking                 | 8             |
| Hamdy, 2011[35]                | Egypt     | Caucasian | 25           | 25              | Composite genotype of <i>IL-1A</i> (-889) and <i>IL-1B</i> (+3954)                                                                                                                               | Peri-implantitis                            | Age, sex, and smoking                 | 8             |
| Melo, 2012[36]                 | Brazil    | Mixed     | 16           | 31              | <i>IL-1A</i> (-889): 0.976,<br><i>IL-1B</i> (-511): 0.213,<br><i>IL-1B</i> (+3954): 0.380                                                                                                        | Peri-implantitis                            | Age, sex, and smoking                 | 7             |
| Vaz, 2012[37]                  | Portugal  | Caucasian | 55           | 100             | Composite genotype of <i>IL-1A</i> (-889) and <i>IL-1B</i> (+3953)                                                                                                                               | Implant failure or biological complications | NR                                    | 6             |
| Jacobi-Gresser, 2013[38]       | German    | Caucasian | 41           | 68              | <i>IL-1A</i> (-889): 0.606<br><i>IL-1B</i> (+3953): 0.163                                                                                                                                        | Implant failure                             | Age and smoking                       | 8             |
| Cosyn, 2016 [15]               | Belgium   | Caucasian | 14           | 14              | <i>IL-1A</i> (-889): 0.512,<br><i>IL-1B</i> (-511): 0.803,<br><i>IL-1B</i> (+3954): 0.889                                                                                                        | Implant failure                             | Age, sex, and smoking                 | 8             |
| Petkovic-Curcin, 2017 [39]     | Serbia    | Caucasian | 34           | 64              | <i>IL-1RN</i> (VNTR): 0.516                                                                                                                                                                      | Peri-implantitis                            | Age and sex                           | 8             |
| Agrawal, 2021 [40]             | India     | Asian     | 68           | 63              | <i>IL-1A</i> (-889): 0.730,<br><i>IL-1B</i> (-511): 0.249,<br><i>IL-1B</i> (+3954): 0.479                                                                                                        | Marginal bone loss                          | NR                                    | 7             |
| Saremi, 2021 [41]              | Iran      | Caucasian | 50           | 89              | <i>IL-1B</i> (+3954): 0.699                                                                                                                                                                      | Peri-implantitis                            | Age and sex                           | 9             |

NR: Not reported. \* Age, sex, and smoking.

**Table S2.** Subgroup analysis of the association between alleles, genotypes of *IL-1A* (-889) polymorphism and the risk of dental PID.

| Variable (N)           | T vs. C                               | TT vs. CC                             | TC vs. CC                              | TT + TC vs. CC                         | TT vs. CC + TC                        |
|------------------------|---------------------------------------|---------------------------------------|----------------------------------------|----------------------------------------|---------------------------------------|
|                        | OR (95%CI), <i>p</i> , I <sup>2</sup> | OR (95%CI), <i>p</i> , I <sup>2</sup> | OR (95%CI), <i>p</i> , I <sup>2</sup>  | OR (95%CI), <i>p</i> , I <sup>2</sup>  | OR (95%CI), <i>p</i> , I <sup>2</sup> |
| All (8)                | 1.19 (0.92, 1.55),<br>0.19, 0%        | 1.18 (0.62, 2.25),<br>0.61, 0%        | 1.45 (0.97, 2.16),<br>0.07, 0%         | 1.43 (0.98, 2.10),<br>0.07, 0%         | 1.02 (0.64, 1.63),<br>0.94, 0%        |
| Ethnicity              |                                       |                                       |                                        |                                        |                                       |
| Caucasian (4)          | 1.35 (0.95, 1.93),<br>0.09, 29%       | 1.27 (0.47, 3.40),<br>0.63, 25%       | 1.79 (1.10, 2.89),<br><b>0.02</b> , 0% | 1.73 (1.08, 2.76),<br><b>0.02</b> , 0% | 0.95 (0.37, 2.49),<br>0.92, 15%       |
| Asian (2)              | 1.10 (0.66, 1.82),<br>0.71, 0%        | 1.19 (0.40, 3.55),<br>0.75, 0%        | 0.76 (0.28, 2.10),<br>0.60, 0%         | 0.93 (0.36, 2.39),<br>0.88, 0%         | 1.23 (0.63, 2.40),<br>0.54, 0%        |
| Mixed (2)              | 0.90 (0.48, 1.68),<br>0.74, 0%        | 1.02 (0.27, 3.90),<br>0.98, 0%        | 1.08 (0.38, 3.09),<br>0.88, 0%         | 1.02 (0.39, 2.65),<br>0.96, 0%         | 0.75 (0.29, 1.91),<br>0.54, 0%        |
| Outcome                |                                       |                                       |                                        |                                        |                                       |
| Peri-implantitis (2)   | 0.98 (0.60, 1.58),<br>0.92, 0%        | 0.67 (0.14, 3.29),<br>0.62, 0%        | 1.36 (0.65, 2.88),<br>0.41, 0%         | 1.26 (0.60, 2.63),<br>0.54, 0%         | 0.55 (0.20, 1.54),<br>0.26, 0%        |
| Implant failure (4)    | 1.43 (0.96, 2.13),<br>0.08, 24%       | 1.42 (0.57, 3.55),<br>0.45, 7%        | 1.80 (1.05, 3.09),<br><b>0.03</b> , 0% | 1.73 (1.03, 2.89),<br><b>0.04</b> , 0% | 1.16 (0.47, 2.81),<br>0.75, 0%        |
| Marginal bone loss (2) | 1.10 (0.66, 1.82),<br>0.71, 0%        | 1.19 (0.40, 3.55),<br>0.75, 0%        | 0.76 (0.28, 2.10),<br>0.60, 0%         | 0.93 (0.36, 2.39),<br>0.88, 0%         | 1.23 (0.63, 2.40),<br>0.54, 0%        |
| Sample size            |                                       |                                       |                                        |                                        |                                       |
| >100 (3)               | 1.20 (0.87, 1.66),<br>0.26, 0%        | 1.08 (0.46, 2.54),<br>0.86, 0%        | 1.45 (0.87, 2.40),<br>0.15, 0%         | 1.44 (0.88, 2.35),<br>0.14, 0%         | 1.09 (0.60, 1.98),<br>0.77, 0%        |
| ≤100 (5)               | 1.16 (0.74, 1.83),<br>0.51, 1%        | 1.33 (0.50, 3.51),<br>0.57, 0%        | 1.45 (0.75, 2.78),<br>0.27, 0%         | 1.41 (0.77, 2.61),<br>0.27, 0%         | 0.91 (0.42, 1.96),<br>0.80, 0%        |

Bold number shows the association is statistically significant ( $p < 0.05$ ).

**Table S3.** Subgroup analysis of the association between alleles, genotypes of *IL-1B* (-511) polymorphism and the risk of dental PID.

| Variable (N)           | T vs. C                               | TT vs. CC                             | TC vs. CC                               | TT + TC vs. CC                        | TT vs. CC + TC                          |
|------------------------|---------------------------------------|---------------------------------------|-----------------------------------------|---------------------------------------|-----------------------------------------|
|                        | OR (95%CI), <i>p</i> , I <sup>2</sup> | OR (95%CI), <i>p</i> , I <sup>2</sup> | OR (95%CI), <i>p</i> , I <sup>2</sup>   | OR (95%CI), <i>p</i> , I <sup>2</sup> | OR (95%CI), <i>p</i> , I <sup>2</sup>   |
| All (8)                | 1.10 (0.69, 1.75),<br>0.70, 75%       | 1.20 (0.59, 2.42),<br>0.61, 54%       | 0.72 (0.52, 1.01),<br>0.06, 18%         | 0.84 (0.61, 1.14),<br>0.25, 48%       | 1.45 (1.00, 2.09),<br>0.05, 42%         |
| Ethnicity              |                                       |                                       |                                         |                                       |                                         |
| Caucasian (2)          | 0.95 (0.59, 1.53),<br>0.83, 0%        | 1.04 (0.36, 2.94),<br>0.95, 0%        | 0.77 (0.37, 1.60),<br>0.48, 0%          | 0.83 (0.41, 1.66),<br>0.59, 0%        | 1.14 (0.46, 2.81),<br>0.78, 0%          |
| Asian (3)              | 1.55 (0.36, 6.73),<br>0.56, 92%       | 1.49 (0.18, 12.22),<br>0.71, 84%      | 0.47 (0.25, 0.86),<br><b>0.02</b> , 19% | 0.85 (0.23, 3.16),<br>0.81, 75%       | 1.97 (0.38, 10.20),<br>0.42, 82%        |
| Mixed (3)              | 1.12 (0.83, 1.52),<br>0.46, 8%        | 1.45 (0.80, 2.64),<br>0.22, 0%        | 0.91 (0.57, 1.46),<br>0.70, 38%         | 1.05 (0.68, 1.62),<br>0.83, 28%       | 1.55 (0.90, 2.64),<br>0.11, 0%          |
| Outcome                |                                       |                                       |                                         |                                       |                                         |
| Peri-implantitis (2)   | 0.96 (0.59, 1.54),<br>0.85, 0%        | 1.35 (0.47, 3.90),<br>0.58, 0%        | 0.90 (0.46, 1.77),<br>0.77, 0%          | 0.97 (0.51, 1.86),<br>0.94, 0%        | 1.41 (0.53, 3.76),<br>0.49, 0%          |
| Implant failure (3)    | 1.12 (0.82, 1.52),<br>0.47, 12%       | 1.33 (0.73, 2.41),<br>0.35, 0%        | 0.85 (0.52, 1.39),<br>0.52, 32%         | 0.98 (0.63, 1.54),<br>0.94, 28%       | 1.43 (0.85, 2.41),<br>0.18, 0%          |
| Marginal bone loss (3) | 1.55 (0.36, 6.73),<br>0.56, 92%       | 1.49 (0.18, 12.22),<br>0.71, 84%      | 0.47 (0.25, 0.86),<br><b>0.02</b> , 19% | 0.85 (0.23, 3.16),<br>0.81, 75%       | 1.97 (0.38, 10.20),<br>82%              |
| Sample size            |                                       |                                       |                                         |                                       |                                         |
| >100 (3)               | 0.85 (0.45, 1.60),<br>0.61, 83%       | 0.82 (0.24, 2.84),<br>0.76, 78%       | 0.67 (0.33, 1.36),<br>0.27, 67%         | 0.70 (0.30, 1.61),<br>0.40, 79%       | 1.06 (0.46, 2.43),<br>0.89, 60%         |
| ≤100 (5)               | 1.36 (0.66, 2.80),<br>0.41, 70%       | 1.68 (0.82, 3.44),<br>0.16, 16%       | 0.72 (0.38, 1.36),<br>0.32, 0%          | 0.99 (0.55, 1.76),<br>0.97, 0%        | 2.06 (1.13, 3.75),<br><b>0.02</b> , 23% |

Bold number shows the association is statistically significant ( $p < 0.05$ ).

**Table S4.** Subgroup analysis of the association between alleles, genotypes of *IL-1B* (+3954) polymorphism and the risk of dental PID.

| Variable (N)           | T vs. C                                  | TT vs. CC                             | TC vs. CC                                | TT + TC vs. CC                            | TT vs. CC + TC                        |
|------------------------|------------------------------------------|---------------------------------------|------------------------------------------|-------------------------------------------|---------------------------------------|
|                        | OR (95%CI), <i>p</i> , I <sup>2</sup>    | OR (95%CI), <i>p</i> , I <sup>2</sup> | OR (95%CI), <i>p</i> , I <sup>2</sup>    | OR (95%CI), <i>p</i> , I <sup>2</sup>     | OR (95%CI), <i>p</i> , I <sup>2</sup> |
| All (7)                | 2.04 (1.02, 4.08),<br><b>0.04</b> , 73%  | 1.73 (0.45, 6.58),<br>0.42, 52%       | 1.68 (1.18, 2.39),<br><b>0.004</b> , 49% | 2.27 (1.11, 4.64),<br><b>0.03</b> , 65%   | 1.19 (0.58, 2.45),<br>0.63, 42%       |
| Ethnicity              |                                          |                                       |                                          |                                           |                                       |
| Caucasian (3)          | 3.61 (0.66, 19.75),<br>0.14, 88%         | 3.76 (0.27, 52.13),<br>0.32, 71%      | 2.91 (0.81, 10.40),<br>0.10, 71%         | 3.59 (0.75, 17.28),<br>0.11, 82%          | 2.78 (0.25, 30.80),<br>0.40, 66%      |
| Asian (2)              | 2.33 (0.67, 8.05),<br>0.18, 34%          | Not estimable                         | 2.45 (0.69, 8.74), 0.17,<br>39%          | 2.45 (0.69, 8.74),<br>0.17, 39%           | Not estimable                         |
| Mixed (2)              | 1.13 (0.77, 1.67),<br>0.52, 42%          | 0.85 (0.26, 2.80),<br>0.78, 28%       | 1.36 (0.84, 2.21), 0.21,<br>47%          | 1.25 (0.79, 1.99),<br>0.34, 16%           | 0.69 (0.21, 2.26),<br>0.54, 0%        |
| Outcome                |                                          |                                       |                                          |                                           |                                       |
| Peri-implantitis (3)   | 2.12 (0.67, 6.66),<br>0.20, 84%          | 2.20 (0.31, 15.78),<br>0.43, 63%      | 2.26 (0.91, 5.63), 0.08,<br>59%          | 2.43 (0.78, 7.58),<br>0.13, 76%           | 1.58 (0.27, 9.29),<br>0.61, 59%       |
| Implant failure (2)    | 3.16 (0.22, 45.01),<br>0.40, 84%         | 1.66 (0.09, 30.16),<br>0.73, 64%      | 2.97 (0.30, 29.51),<br>0.35, 74%         | 3.47 (0.24, 50.45),<br>0.36, 81%          | 0.87 (0.26, 2.92),<br>0.82, 49%       |
| Marginal bone loss (2) | 2.33 (0.67, 8.05),<br>0.18, 34%          | Not estimable                         | 2.45 (0.69, 8.74), 0.17,<br>39%          | 2.45 (0.69, 8.74),<br>0.17, 39%           | Not estimable                         |
| Sample size            |                                          |                                       |                                          |                                           |                                       |
| >100 (3)               | 1.25 (0.92, 1.71),<br>0.15, 86%          | 1.10 (0.48, 2.54),<br>0.82, 65%       | 1.41 (0.95, 2.09), 0.09,<br>61%          | 1.40 (0.96, 2.04),<br>0.08, 78%           | 1.00 (0.44, 2.28),<br>0.99, 62%       |
| ≤100 (4)               | 2.88 (1.49, 5.58),<br><b>0.002</b> , 35% | 4.07 (0.80, 20.69),<br>0.09, 0%       | 3.58 (1.55, 8.28),<br><b>0.003</b> , 5%  | 4.80 (1.95, 11.82),<br><b>0.0006</b> , 0% | 2.18 (0.47, 10.02),<br>0.32, 0%       |

Bold number shows the association is statistically significant ( $p < 0.05$ ).

**Table S5.** Meta-regression analysis of the association between alleles and genotypes of *IL-1A* (-889), *IL-1B* (-511), and *IL-1B* (+3954) polymorphisms and the risk of dental PID.

| Variable            |                         | <i>IL-1A</i> (-889)  |           |           |                |                |
|---------------------|-------------------------|----------------------|-----------|-----------|----------------|----------------|
|                     |                         | T vs. C              | TT vs. CC | TC vs. CC | TT + CT vs. CC | TT vs. CC + CT |
| Year of publication | R                       | 0.375                | 0.330     | 0.293     | 0.375          | 0.237          |
|                     | Adjusted R <sup>2</sup> | -0.003               | -0.040    | -0.067    | -0.002         | -0.101         |
|                     | P-value                 | 0.361                | 0.425     | 0.482     | 0.359          | 0.571          |
| Sample size         | R                       | 0.352                | 0.496     | 0.384     | 0.385          | 0.496          |
|                     | Adjusted R <sup>2</sup> | -0.022               | 0.121     | 0.006     | 0.006          | 0.120          |
|                     | P-value                 | 0.393                | 0.211     | 0.347     | 0.347          | 0.211          |
| Ethnicity           | R                       | 0.468                | 0.297     | 0.350     | 0.450          | 0.244          |
|                     | Adjusted R <sup>2</sup> | 0.088                | -0.064    | -0.024    | 0.070          | -0.097         |
|                     | P-value                 | 0.243                | 0.475     | 0.396     | 0.263          | 0.561          |
| Outcome             | R                       | 0.109                | 0.164     | 0.453     | 0.156          | 0.363          |
|                     | Adjusted R <sup>2</sup> | -0.153               | -0.135    | 0.073     | -0.138         | -0.013         |
|                     | P-value                 | 0.798                | 0.698     | 0.259     | 0.713          | 0.376          |
| Variable            |                         | <i>IL-1B</i> (-511)  |           |           |                |                |
|                     |                         | T vs. C              | TT vs. CC | TC vs. CC | TT + CT vs. CC | TT vs. CC + CT |
| Year of publication | R                       | 0.521                | 0.651     | 0.222     | 0.556          | 0.683          |
|                     | Adjusted R <sup>2</sup> | 0.150                | 0.328     | -0.109    | 0.194          | 0.378          |
|                     | P-value                 | 0.185                | 0.080     | 0.597     | 0.152          | 0.062          |
| Sample size         | R                       | 0.170                | 0.222     | 0.081     | 0.092          | 0.255          |
|                     | Adjusted R <sup>2</sup> | -0.133               | -0.109    | -0.159    | -0.157         | -0.091         |
|                     | P-value                 | 0.687                | 0.598     | 0.848     | 0.828          | 0.542          |
| Ethnicity           | R                       | 0.050                | 0.047     | 0.257     | 0.193          | 0.007          |
|                     | Adjusted R <sup>2</sup> | -0.164               | -0.164    | -0.090    | -0.123         | -0.167         |
|                     | P-value                 | 0.907                | 0.911     | 0.539     | 0.648          | 0.988          |
| Outcome             | R                       | 0.520                | 0.422     | 0.400     | 0.106          | 0.487          |
|                     | Adjusted R <sup>2</sup> | 0.149                | 0.042     | 0.020     | -0.154         | 0.110          |
|                     | P-value                 | 0.186                | 0.297     | 0.326     | 0.803          | 0.221          |
| Variable            |                         | <i>IL-1B</i> (+3954) |           |           |                |                |
|                     |                         | T vs. C              | TT vs. CC | TC vs. CC | TT + CT vs. CC | TT vs. CC + CT |
| Year of publication | R                       | 0.639                | 0.948     | 0.567     | 0.588          | 0.911          |
|                     | Adjusted R <sup>2</sup> | 0.290                | 0.866     | 0.186     | 0.214          | 0.773          |
|                     | P-value                 | 0.122                | 0.014     | 0.184     | 0.165          | <b>0.032</b>   |
| Sample size         | R                       | 0.366                | 0.190     | 0.435     | 0.404          | 0.086          |
|                     | Adjusted R <sup>2</sup> | -0.039               | -0.285    | 0.027     | -0.004         | -0.324         |
|                     | P-value                 | 0.419                | 0.760     | 0.330     | 0.368          | 0.891          |
| Ethnicity           | R                       | 0.532                | 0.567     | 0.427     | 0.472          | 0.532          |
|                     | Adjusted R <sup>2</sup> | 0.140                | 0.095     | 0.019     | 0.068          | 0.044          |
|                     | P-value                 | 0.219                | 0.319     | 0.339     | 0.285          | 0.356          |
| Outcome             | R                       | 0.004                | 0.164     | 0.025     | 0.008          | 0.248          |
|                     | Adjusted R <sup>2</sup> | -0.200               | -0.297    | -0.199    | -0.200         | -0.251         |
|                     | P-value                 | 0.992                | 0.792     | 0.958     | 0.986          | 0.687          |

Bold number shows the association is statistically significant ( $p < 0.05$ ).

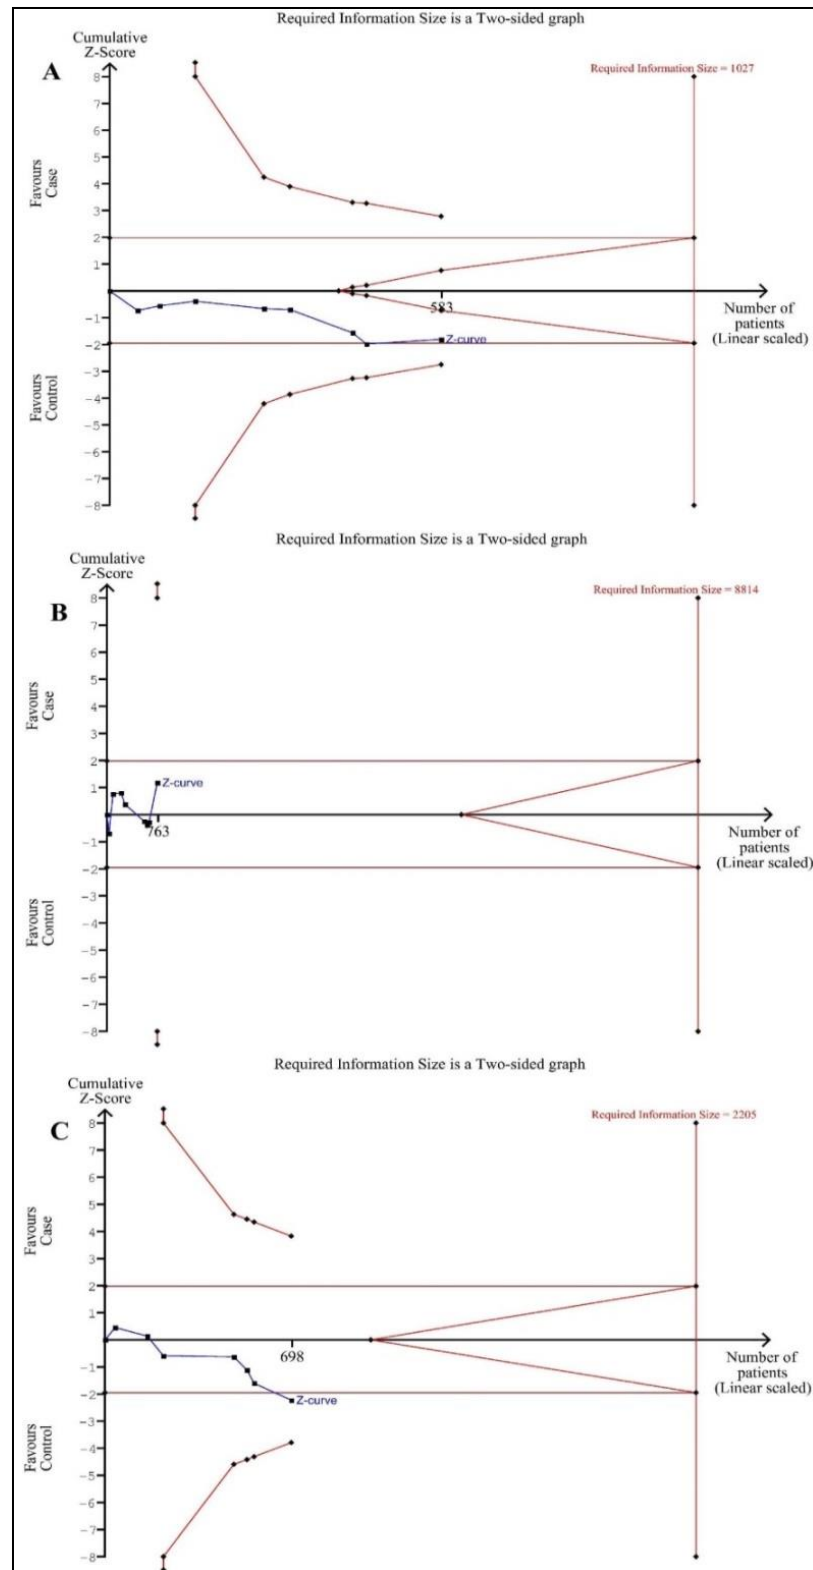

**Figure S1.** Trial sequential analysis of the association between genotypes of three polymorphisms and the risk of dental PID based on recessive model (TT + CT vs. CC). (A) IL-1A (-889) [D2 = 0%; RIS = 1027]; (B) IL-1B (-511) [D2 = 57%; RIS = 8814]; and (D) IL-1B (+3954) [D2 = 76%; RIS = 2205].

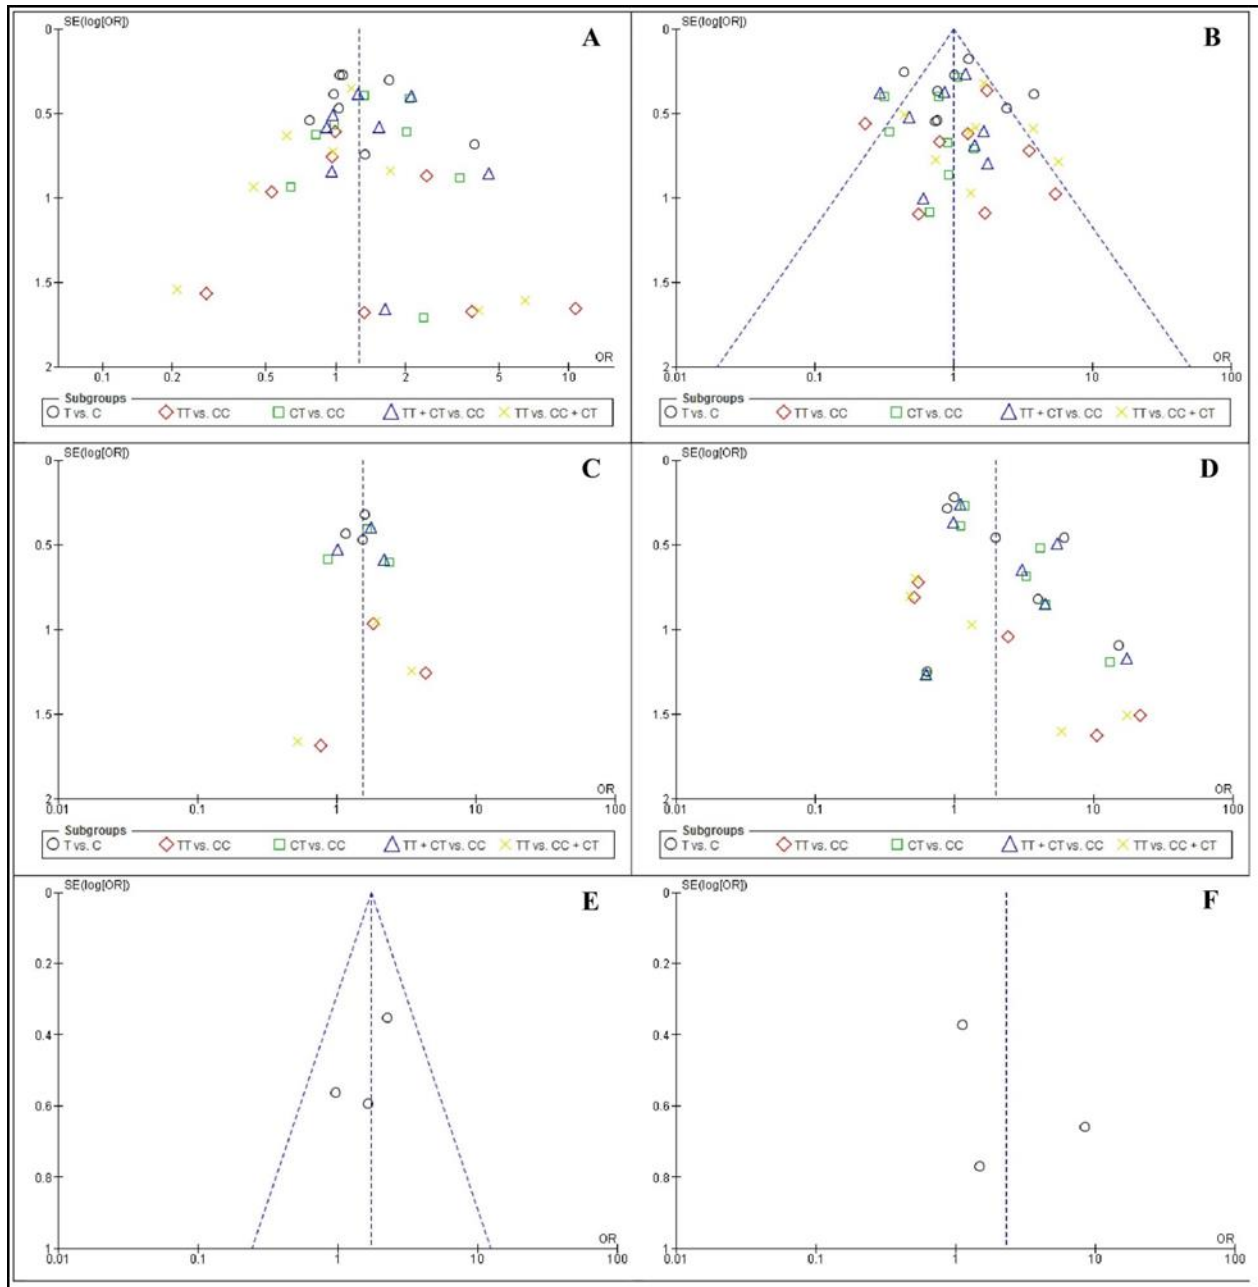

**Figure S2.** Funnel plot analysis of the association between alleles, genotypes of *IL-1* polymorphisms and the risk of dental PID. (A) *IL-1A* (-889); (B) *IL-1B* (-511); (C) *IL-1B* (+3953); (D) *IL-1B* (+3954); (E) composite genotype of *IL-1A* (-889)/*IL-1B* (+3953); and (F) composite genotype of *IL-1A* (-889)/*IL-1B* (+3954).
